# Supplementary material for: Control of microtubule trajectory within an electric field by altering surface charge density
Source: PubMed Central journal article supplement — Sci Rep. 2015 Jan 8;5:7669. doi: 10.1038/srep07669 (PMC4286733; doi:10.1038/srep07669), 2015-01-08
Supplement: srep07669-s1.pdf [file srep07669-s1.pdf]

Supplementary Information (SI) to accompany  
**Control of microtubule trajectory within an electric field**  
**by altering surface charge density**

Naoto Isozaki, Suguru Ando, Tasuku Nakahara, Hirofumi Shintaku,  
Hidetoshi Kotera, Edgar Meyhöfer, and Ryuji Yokokawa\*

\*Ryuji Yokokawa

Department of Micro Engineering

Kyoto University

Kyotodaigaku-katsura, Nishikyo-ku

Kyoto 615-8540, Japan

Tel/Fax: +81-75-383-3682

Email: ryuji@me.kyoto-u.ac.jp

## Contents

|                                       |   |
|---------------------------------------|---|
| <b>1. Supplementary figures</b> ..... | 3 |
| <b>2. Supplementary methods</b> ..... | 6 |
| <b>3. Supplementary movies</b> .....  | 8 |
| <b>References</b> .....               | 9 |

## 1. Supplementary figures

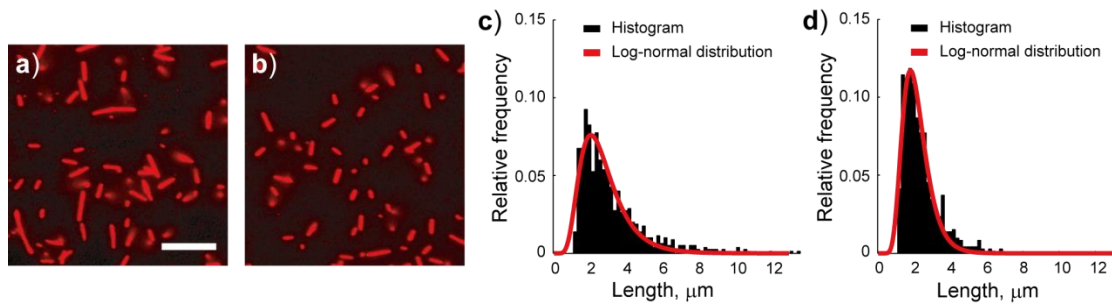

**Figure S1.** Effect of syringe shearing on B-seed lengths. Fluorescence images of B-R-seeds (a) before and (b) after syringe shearing. Scale bar = 10  $\mu\text{m}$ . Length distribution (c) before ( $n = 801$ ) and (d) after shearing ( $n = 726$ ). Measured relative frequency (black bars) and fitted log normal distribution (red lines). Bin size = 0.2  $\mu\text{m}$ .

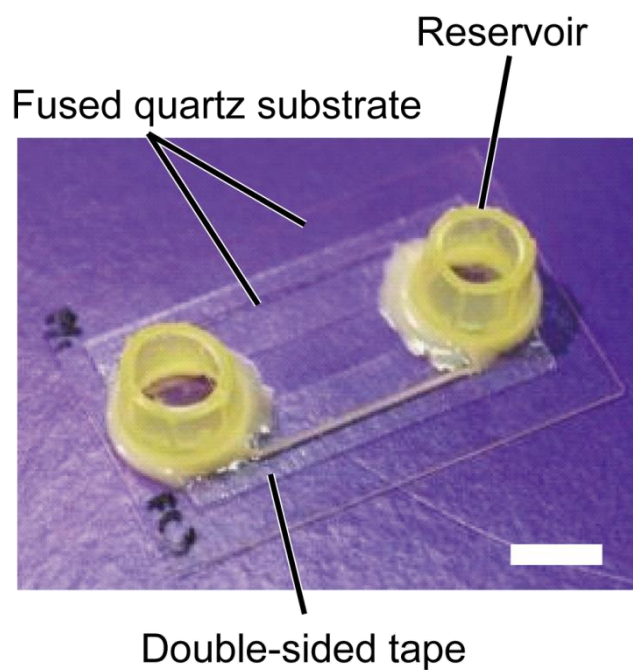

**Figure S2.** A FC with reservoirs. Channel width, length, and height are 3.5 mm, 15 mm, and 50  $\mu\text{m}$ , respectively. The FC volume is  $\sim 2.6 \mu\text{l}$ . Scale bar = 5 mm.

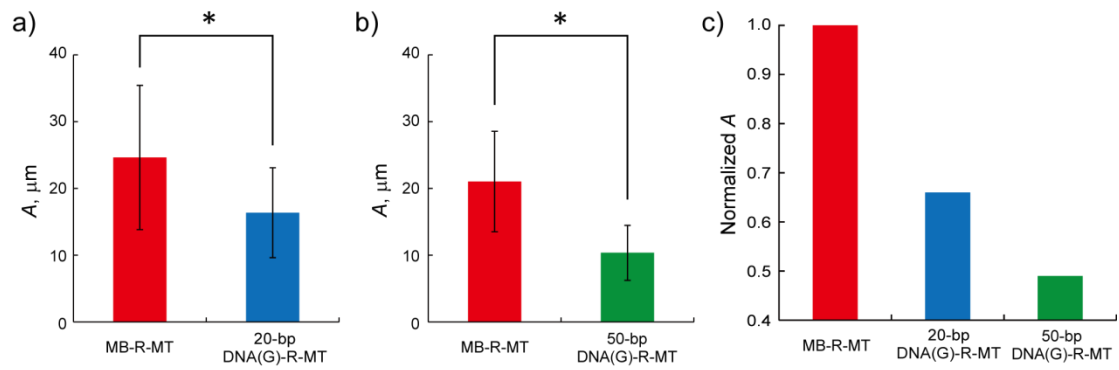

**Figure S3.** Evaluation of  $A$  values for minus end-labeled MT.  $A$  values measured for (a) MB-R-MT ( $n = 36$ ) and 20-bp DNA(G)-R-MT ( $n = 16$ ) in FC-20 ( $*p < 0.01$ , t test); and (b) MB-R-MT ( $n = 37$ ) and 50-bp DNA(G)-R-MT ( $n = 20$ ) in FC-50 ( $*p < 0.01$ , t test). (c) Ratios of mean  $A$  value of DNA-labeled MB-MT to that of MB-R-MT.

## 2. Supplementary methods

The derivation of Debye length in a FC and effective charges of tubulin dimers and labeled DNA molecules is described. At pH 6.8, the BRB80 buffer solution contained 38 mM PIPES<sup>-</sup>, 42 mM PIPES<sup>2-</sup>, 122 mM K<sup>+</sup>, 1 mM Mg<sup>2+</sup>, and 2 mM Cl<sup>-</sup>, given that the pK<sub>a1</sub> and pK<sub>a2</sub> of PIPES are < 3.0 and 6.76, respectively, at 25°C. Debye length  $\lambda_D$  was expressed as

$$\lambda_D = \sqrt{\frac{\epsilon k_B T}{2N_A e^2 \sum_i c_i z_i^2}} \quad (\text{S1})$$

where  $k_B$  is the Boltzmann constant,  $T$  is temperature,  $N_A$  is the Avogadro constant, and  $e$  is the elementary charge,<sup>1</sup> and was calculated as a summation over all ion species  $i$  with valence  $z_i$  and molar concentration  $c_i$ . Using the dielectric constant of water ( $\epsilon = 6.93 \times 10^{-10} \text{ C V}^{-1} \text{ m}^{-1}$ ) for BRB80 buffer solution and constants  $k_B = 1.38 \times 10^{-23} \text{ J K}^{-1}$ ,  $N_A = 6.02 \times 10^{23} \text{ mol}^{-1}$ ,  $e = 1.60 \times 10^{-19} \text{ C}$ , and  $T = 298 \text{ K}$ ,  $\lambda_D$  was calculated as 0.74 nm from equation S1. As discussed in the main text,  $\lambda_D$  provides zeta potential  $\zeta$  and surface charge density  $\sigma$  of seed MTs from equations 1 and 2 (Table 1). When there is no DNA molecule labeled on a tubulin dimer, an effective charge of  $10 e^-$  and  $9.7 e^-$  per bare tubulin dimer is calculated with  $\sigma$  for R-seed and G-seed, respectively, assuming a surface area of  $50 \text{ nm}^2$ .<sup>2</sup> Surface areas of 20- and 50-bp dsDNAs were calculated as 47 and  $117 \text{ nm}^2$ , respectively, assuming that DNA has a cylindrical structure with a diameter and length of 2.2 nm and 0.34 nm per bp, respectively.<sup>3</sup> Given that SA binds to 80% of the biotin on MTs,<sup>4</sup> 200% of the SA was bound to biotinylated DNA<sup>5</sup> and 3.2 biotin molecules were bound to a tubulin dimer (for a biotinylation ratio of 320%), and the number of DNA molecules conjugated to a tubulin dimer was calculated as 5.1. The total surface area of 20-bp DNA(G)-R-seed was the sum of the DNA and tubulin dimer surfaces ( $47 \times 5.1 \text{ nm}^2$  and  $50 \text{ nm}^2$ ,

respectively). Thus, the total effective charge of 20-bp DNA(G)-R-seed per tubulin dimer was calculated as  $73.7 e^-$  by multiplying  $\sigma (= 0.25 e^- \text{ nm}^{-2}$ , Table 1) by the total surface area ( $47 \times 5.1 + 50 \text{ nm}^2$ ). Since the effective charge of a bare tubulin dimer was  $10 e^-$ , the total effective charge of 20-bp DNA on a tubulin dimer was  $63.7 e^-$ . It was divided by the number of DNA molecules on a tubulin dimer (5.1) to obtain the net effective charge per single 20-bp DNA of  $12.4 e^-$  ( $0.62 e^-$  per bp). The corresponding value per single 50-bp DNA was also calculated as  $34.5 e^-$  ( $0.69 e^-$  per bp). The effective charge for 50-bp DNA was constant regardless of their tagged-fluorophores.

### 3. Supplementary movies

**Movie S1.** Gliding of 20-bp DNA(G)-R-MTs and MB-R-MTs under an average electric field of  $E = 7 \text{ kV m}^{-1}$  (from right to left) in FC-20 (40× actual speed). Scale bar = 10  $\mu\text{m}$ .

**Movie S2.** Gliding of 50-bp DNA(G)-R-MTs and MB-R-MTs under an average electric field of  $E = 7 \text{ kV m}^{-1}$  (from right to left) in FC-50 (40× actual speed). Scale bar = 10  $\mu\text{m}$ .

**Movie S3.** Gliding of 50-bp DNA(R)-G-MTs, 20-bp DNA(G)-R-MTs, and MB-R-MTs under an average electric field of  $E = 7 \text{ kV m}^{-1}$  (from right to left) in FC-mix (40× actual speed). Scale bar = 10  $\mu\text{m}$ .



## References

1. Russel, W. B., Saville, D. A. & Schowalter, W. R. *Colloidal dispersions*. (Cambridge university press, New York, 1992).
2. van den Heuvel, M. G., de Graaff, M. P. & Dekker, C. Molecular sorting by electrical steering of microtubules in kinesin-coated channels. *Science* **312**, 910-914 (2006).
3. van Dorp, S., Keyser, U. F., Dekker, N. H., Dekker, C. & Lemay, S. G. Origin of the electrophoretic force on DNA in solid-state nanopores. *Nat. Phys.* **5**, 347-351 (2009).
4. Dinu, C. Z. *et al.* Parallel manipulation of bifunctional DNA molecules on structured surfaces using kinesin-driven microtubules. *Small* **2**, 1090-1098 (2006).
5. Caruso, F., Rodda, E., Furlong, D. N., Niikura, K. & Okahata, Y. Quartz crystal microbalance study of DNA immobilization and hybridization for nucleic Acid sensor development. *Anal. Chem.* **69**, 2043-2049 (1997).
